# Supplementary material
Source: PubMed Central journal article supplement (PMC6659156)
Supplement: jamaotolaryngolheadnecksurg-e191765-s001.pdf [file jamaotolaryngolheadnecksurg-e191765-s001.pdf]

## Supplementary Online Content

Anschuetz L, Niederhauser L, Wimmer W, et al. Comparison of 3- vs 2-dimensional endoscopy using eye tracking and assessment of cognitive load among surgeons performing endoscopic ear surgery. *JAMA Otolaryngol Head Neck Surg*. Published online July 25, 2019. doi:10.1001/jamaoto.2019.1765

**eTable 1.** Counterbalanced Design of Trial Order by Latin Square

**eTable 2.** Postoperative Questionnaires Answered by Participants for Both Endoscopic Techniques

**eTable 3.** Mean and Standard Deviation for Fixation Duration in Milliseconds

This supplementary material has been provided by the authors to give readers additional information about their work.

**eTable 1: Counterbalanced design of trial order by Latin Square**

| <b>1<sup>st</sup> trial</b> | <b>2<sup>nd</sup> trial</b> | <b>3<sup>rd</sup> trial</b> | <b>4<sup>th</sup> trial</b> | <b>Participants</b> |
|-----------------------------|-----------------------------|-----------------------------|-----------------------------|---------------------|
| 1                           | 2                           | 3                           | 4                           | ¼ of participants   |
| 2                           | 4                           | 1                           | 3                           | ¼ of participants   |
| 4                           | 3                           | 2                           | 1                           | ¼ of participants   |
| 3                           | 1                           | 4                           | 2                           | ¼ of participants   |

1 = Tympanoplasty in 3D, 2 = Stapedotomy in 3D, 3 = Tympanoplasty in 2D, 4 = Stapedotomy in 2D

**eTable 2: Postoperative questionnaires answered by participants for both endoscopic techniques**

| Rating                  | Scale                                          | Items                                                                                                                                                                                                                                                                                                                                                   | Mean per technique;<br>95% Confidence Interval (CI) |
|-------------------------|------------------------------------------------|---------------------------------------------------------------------------------------------------------------------------------------------------------------------------------------------------------------------------------------------------------------------------------------------------------------------------------------------------------|-----------------------------------------------------|
| <b>Usability</b>        | 7-point<br>(not at all – very much)            | Device suitable for the task.<br>Difficult to position device.<br>Device supporting near and far differentiation.<br>Device allows for good orientation.<br>Device stimulated working.<br>Device is user-friendly.<br>Device is suitable for real surgeries.<br>Device allows for good view on the situs.<br>Working besides the device was possible.   | 3D = 5.39<br>2D = 5.22<br><br>95% CI = -0.51-0.85   |
| <b>Naturalness</b>      | 5-point<br>(not at all natural – very natural) | How natural did the situs appear on the screen?                                                                                                                                                                                                                                                                                                         | 3D = 4.25<br>2D = 4.38<br><br>95% CI = -0.85-0.60   |
| <b>Discomfort</b>       | 7-point<br>(not at all – very much)            | Endoscopy was straining for the eyes.<br>Endoscopy was exhausting for the eyes.<br>Endoscopy caused eye pain.<br>Endoscopy caused dry eyes.<br>Endoscopy caused watery eyes.<br>Endoscopy caused blurred pictures at close distances.<br>Endoscopy caused blurred pictures at far distances.<br>Endoscopy caused headaches.<br>Endoscopy caused nausea. | 3D = 2.19<br>2D = 1.44<br><br>95% CI = 0.28-1.20    |
| <b>Depth perception</b> | 5-point<br>(very bad – very good)              | How was the depth perception?                                                                                                                                                                                                                                                                                                                           | 3D = 4.44<br>2D = 2.81<br><br>95% CI = 0.49-2.76    |
| <b>Image quality</b>    | 5-point<br>(very bad – very good)              | How did you perceive the image quality?                                                                                                                                                                                                                                                                                                                 | 3D = 4.38<br>2D = 4.50<br><br>95% CI = -0.64-0.39   |

**eTable 3: Mean and standard deviation for fixation duration in milliseconds.**

N refers to the number of intervention assessed. Bold numbers indicate a significant difference between tasks for residents, as well as a significant effect of the endoscopic technique for consultants in multivariate analysis.

|                         | Resident          |                   |                          | Consultants              |                          |                   | Whole cohort      |                       |                   |
|-------------------------|-------------------|-------------------|--------------------------|--------------------------|--------------------------|-------------------|-------------------|-----------------------|-------------------|
|                         | 2D<br>(n=22)      | 3D<br>(n=22)      | Total<br>(n=44)          | 2D<br>(n=10)             | 3D<br>(n=10)             | Total<br>(n=20)   | 2D<br>(n=32)      | 3D<br>(n=32)          | Total<br>(n=64)   |
| Tympanoplasty<br>(n=32) | 0.53 s<br>(0.2 s) | 0.49 s<br>(0.2 s) | <b>0.51 s</b><br>(0.2 s) | <b>0.55 s</b><br>(0.1 s) | <b>0.50 s</b><br>(0.1 s) | 0.53 s<br>(0.1 s) | 0.53 s<br>(0.1 s) | 0.49 s<br>(0.1 s)     | 0.51 s<br>(0.1 s) |
| Stapedotomy<br>(n=32)   | 0.76 s<br>(0.3 s) | 0.65 s<br>(0.3 s) | <b>0.71 s</b><br>(0.3 s) | <b>1.02 s</b><br>(0.3 s) | <b>0.57 s</b><br>(0.3 s) | 0.79 s<br>(0.3 s) | 0.85 s<br>(0.3 s) | 0.63 s<br>(0.3 s)     | 0.74 s<br>(0.3 s) |
| Total (n=64)            | 0.65 s<br>(0.3 s) | 0.57 s<br>(0.3 s) | 0.61 s<br>(0.3 s)        | 0.79 s<br>(0.3 s)        | 0.54 s<br>(0.2 s)        | 0.66 s<br>(0.3 s) | 0.69 s<br>(0.3 s) | 0.56 s<br>(0.23<br>s) | 0.62 s<br>(0.3 s) |
